# Supplementary material
Source: MDPI journal article supplement (https://www.mdpi.com/2036-7449/15/1/12)
Supplement: s1 [file s1]

---

# Supplementary material

1. CRF
2. Data management
3. Detailed statistical methods
4. Additional table of results

# 1. CRF

Figure S1. Content of triage sheet in French. COVID-AMBU study, Switzerland, March-July 2020

## Consultation clinique COVID-19

Etiquette patient.e

Date : \_\_/\_\_/2020 ID évaluateur : \_\_\_\_\_

Atteinte des fonctions supérieures, troubles de la conscience

Constantes : T° \_\_\_ °C ≤35° ou ≥40°C

SpO2 \_\_\_ % <90% <93%

FC \_\_\_ / minutes >125/min >110/min

FR \_\_\_ / minutes ≥ 30/min ≥ 20/min

TA \_\_\_/\_\_\_ mmHg TAs≤90 <110

Poids : \_\_\_ kg Taille : \_\_\_ cm

Drapeau rouge = Critère d'urgence → Avis médical urgent

Drapeau orange et/ou facteurs de risque = → Consultation médicale

En cas de doute, appeler le CDC ou le superviseur de garde

A déjà consulté pour COVID-19. Date : \_\_\_\_\_ Ancien résultat frottis : \_\_\_\_ (pos ou nég.)

**Symptômes :**

- Toux > 4 jours
- Dyspnée > 4 jours
- Maux de gorge > 4 jours
- Fièvre > 4 jours  T° ≥ 38°C
- Douleurs musculaires
- Anosmie
- Agueusie / Dysgueusie
- Autres \_\_\_\_\_

**Facteurs de risque :**

- Age ≥ 65 ans
- HTA
- Diabète
- Maladie cardiovasculaire
- Maladie respiratoire chronique
- Immunosuppression /  Cancer
- Autre facteur, p.ex. femme enceinte, \_\_\_\_\_

En présence d'un facteur de risque →  Consultation médicale

En cas de doute, appeler le CDC ou le superviseur de garde

**Contact :**

- Exposition professionnelle sans protection à un cas confirmé
- Contact avec cas **suspect ou confirmé** vivant sous le même toit alors que la personne était malade ou dans les 24h précédentes
- Contact étroit (<2 mètres et >15 min) avec un cas **confirmé**

**Contexte professionnel :**

- Unisanté
- CHUV
- Autre professionnel de la santé
- Travaille en EMS/ESE (établissement socio-éducatif)

**Orientation :**

- Frottis diagnostique et retour à domicile avec consignes d'auto-isolément
- Consultation médicale à la filière COVID-19
- Consultation aux urgences CHUV

**Frottis naso-pharyngé ce jour :**

- Effectué par infirmière
- Effectué par médecin
- Non effectué ce jour

**Suivi :**

- Suivi téléphonique à 48h accepté
- Suivi téléphonique refusé

**Etude COVID AMBU :**

Informations transmises :  Oui  Non

Consentement signé :  Oui  Non  Va réfléchir

Figure S2. Content of triage sheet, translation in English. COVID-AMBU study, Switzerland, March-July 2020

## COVID-19 Clinical consultation

Date : \_\_/\_\_/2020 ID evaluator : \_\_\_\_\_

Impairment of cognitive functions, altered consciousness

Body parameters : T° \_\_\_ °C ≤35° ou ≥40°C

SpO2 \_\_\_ % <90% < 93%

HR \_\_\_ / minutes >125/min >110/min

RR \_\_\_ / minutes ≥ 30/min ≥ 20/min

BP \_\_\_ / \_\_\_ mmHg TAs≤90 <110

Weight : \_\_\_ kg Taille : \_\_\_ cm

Patient

Has already consulted for COVID-19. Date : \_\_\_\_\_ Former PCR swab result : \_\_\_\_\_

**Symptoms :**

- Cough
- Dyspnea > 4 days
- Sore throat > 4 days
- Fever > 4 days  T °≥ 38°C
- Muscular pain
- Anosmia
- Ageusia / Dysgueusia
- Other \_\_\_\_\_

**Risk factors :**

- Age ≥ 65 years olds
- Arterial hypertension
- Diabetes
- Cardiovascular disease
- Chronic respiratory disease
- Immunosuppression /  Cancer
- Other factor, for example pregnancy, \_\_\_\_\_

If one risk factor present →  
 Medical consultation

**Contact :**

- Unprotected occupational exposure to a confirmed case
- Contact with a suspected or confirmed case living under the same roof when the person was sick or in the previous 24 hours
- Close contact (<2 meters and >15 min) with a **confirmed case**

**Occupational contexte**

- Unisanté
- CHUV
- Other health professional
- Work in socio-educational establishment

**Orientation :**

- Diagnostic smear and return home with self-isolation instructions
- Medical consultation to COVID-19 consultations
- Adressed to the CHUV emergency

**Nasopharyngeal smear of the day :**

- By a nurse
- By a doctor
- Not done today

**Follow-up :**

- Phone follow up at 48h accepted
- Phone follow up refused

**COVID AMBU study :**

Informations given :  
 Yes  No

Consent form signed :  
 Yes  No  Will think about it

---

## **2. Data management**

Data about myalgia and sore throat was only collected after on March 20st, 2020. Information was considered missing before this date.

Education level achieved was grouped into three categories: “High” (University education), “Middle” (Higher secondary education), and “Low” (Lower secondary education or lower).

Occupational position was classified into three categories: “High” (Managers: liberal professions, directors, professors), “Middle” (Lower level executives: teachers, qualified technicians, nurses) and “Low” (Low qualified non-manuals and manuals: sales assistants, clerks, manual workers [22]).

Were categorized as “health workers” professionals working in health structures potentially receiving COVID-19 patients and referring their staff to Unisanté for testing.

---

### 3. Detailed statistical methods

#### COVID-AMBU study, Switzerland, March-July 2020

##### *Calculating the duration of symptom(s)*

The presence or absence of symptoms could only be assessed at the initial consultation and during follow-up visits. Consequently, there was uncertainty regarding the dates at which a symptom started and/or ended, in which case the duration  $D_{ij}$  of symptom  $j$  in patient  $i$  could not be determined exactly. Rather, it is known to lie within an interval  $L_{ij} \leq D_{ij} \leq U_{ij}$ , with  $L_{ij} \geq 0$  and  $U_{ij} \leq \infty$ . In other words, symptoms duration most often represented either interval-censored (i.e.  $U_{ij} < \infty$ ) or right-censored (i.e.  $U_{ij} = \infty$ ) time-to-event data, except when patients could report the exact dates at which symptoms started and ended.

Let  $s_{ij}$  (start) and  $e_{ij}$  (end) refer to the time at which symptom  $j$  first appeared and last disappeared in patient  $i$ , respectively, with  $j = 1, \dots, 5$  indexing the following five main symptoms exclusively: cough, fever, sore throat, dyspnea and anosmia. Additionally, let  $s_{i0}$  denote the time at which the first symptom (irrespective of which one and also considering symptoms outside of the above list) appeared in patient  $i$ , and let  $e_{i0}$  denote the time at which that patient became asymptomatic. When these times are available, that is when a patient could report the exact dates symptoms started and ended, it is straightforward to calculate a duration  $D_{ij} = e_{ij} - s_{ij}$  over which patient  $i$  experienced a given symptom (for  $j = 1, \dots, 5$ ) or a duration over which this patient suffered from at least one symptom (for  $j = 0$ ). However, this is rarely possible in practice due to missingness in either  $s_{ij}$ ,  $e_{ij}$  or both. Such missingness induces uncertainty in  $D_{ij}$ , which is then no longer observable exactly. Since the presence or absence of symptom(s) could only be assessed during follow-up calls, all we know rather is that the duration of symptom(s) lies within an interval of time, such that  $L_{ij} \leq D_{ij} \leq U_{ij}$ , with the lower and upper bound of that interval (i.e.  $L_{ij} \geq 0$  resp.  $U_{ij} \leq \infty$ ) being known exactly.

Let us first consider individual symptoms i.e.  $j > 0$  and denote by  $t_{ik}$  the date of the  $k$ -th follow-up call to patient  $i$  (with  $k = 0$  referring to the initial consultation). Suppose that symptom  $j$  appeared between e.g. the first and second follow-up calls for this patient, so that  $t_{i1} < s_{ij} < t_{i2}$ . Additionally, suppose that symptom  $j$  disappeared e.g. between the third and fourth follow-up calls, so that  $t_{i3} < e_{ij} < t_{i4}$ . In that example, the duration  $D_{ij}$  is interval-censored between  $L_{ij} = t_{i3} - t_{i2}$  and  $U_{ij} = t_{i4} - t_{i1}$ . When symptom  $j$  was already present at the initial consultation,  $s_{ij}$  was considered interval-censored with  $s_{i0} \leq s_{ij} < t_{i0}$ . However, when  $s_{i0}$  was missing, that is when the patient could not recall when he/she first experienced the first symptom, we assumed that the first symptom appeared within the 14 days preceding the initial consultation i.e.  $t_{i0} - 14 < s_{i0} < t_{i0}$ . A delay of 2 weeks before the initial consultation was chosen because the first symptom appeared within about that timeframe in 90% of the patients with non-missing  $s_{i0}$  (for 75% of these patients, the first symptom appeared within 7 days before the consultation). Similarly, when symptom  $j$  was still present during the last follow-up call to patient  $i$  (say at  $t_{i4} = t_{i0} + 28$  days), we assumed that it disappeared between that last follow-up and the date at which the patient became asymptomatic, such that  $t_{i4} < e_{ij} < e_{i0}$ . Such situations would all lead to  $D_{ij}$  being

---

interval-censored. However, when  $e_{i0}$  was missing, that is when the patient could not report the exact date at which the last symptom disappeared, we only considered  $e_{ij} > t_{i4}$  and consequently treated  $D_{ij}$  as being right-censored (i.e.  $U_{ij} = \infty$ ). The duration  $D_{i0}$  with at least one symptom was treated similarly but unlike for  $D_{ij}$  with  $j > 0$  which is either interval- or right-censored, we note that  $D_{i0}$  could sometimes be observed exactly when both  $s_{i0}$  and  $e_{i0}$  were reported.

Furthermore, note that a patient was assumed to experience a given symptom continuously between the first and the last reported occurrence of that symptom. Temporary disappearance of a symptom was not considered as relevant and the severity of the symptom was not taken into account in the analysis.

### *Multiple imputations*

Multiple imputations (MI) [2] were used to impute  $D_{ij}$  in the interval  $[L_{ij}; U_{ij}]$  when  $U_{ij} < \infty$ . They were also used to impute missing covariates values (including missing RT-PCR results for patients who were not tested). A total of 30 imputed datasets was constructed.

Given a set of variables, the technique of multiple imputations (MI) [23] proceeds by modelling each variable with missing values in turn as a function of the other variables. Missing values in the outcome variable are imputed given other covariate values and the process is repeated after selecting another variable as the outcome. Each missing value is imputed  $M$  times in order to build  $M$  complete datasets which can then be analyzed. In this study, we used  $M = 30$  datasets. At last, results from these  $M$  analyses can be pooled using Rubin's rules [23].

The duration  $D_{ij}$  was modelled using a Cox proportional hazard regression, adjusting for several covariates (see Supplementary Table 1 for a comprehensive list) including durations of other symptoms (i.e.  $D_{ik}$  for all  $k \neq j$ ). When including a duration as a predictor in an imputation model, we followed the approach of White [24] and included both the cumulative baseline hazard (as calculated with the Nelson-Aalen estimator) and the event indicator (0=right-censored, 1=observed or interval-censored). Additionally, we also included a binary indicator  $I_{ij}$  taking the value 1 if patient  $i$  did not experience symptom  $j$  at all, and 0 otherwise. This was necessary because when  $I_{ij} = 1$ , both the cumulative baseline hazard and the event indicator for symptom  $j$  are undefined had to be set to zero. Continuous variables (e.g. BMI, body temperature) were modelled using linear regression, dichotomous variables (e.g. PCR result, presence of  $\geq 1$  risk factor) were modelled using logistic regression, and ordinal variables (highest education level and job activity) were modelled using cumulative logit regression. Note that both age and BMI did enter the imputation models as continuous predictors but they were later categorized in the multivariate Cox regression analysis (Table S1).

At iteration 0 of the imputation algorithm, any interval-censored duration  $D_{ij}$  was imputed by randomly drawing a value within the interval  $[L_{ij}; U_{ij}]$  according to a uniform distribution. This was performed separately in each of the  $M$  imputed datasets. Imputed durations were then treated as "observed" values throughout the whole imputation process. At subsequent iterations, any interval-censored duration  $D_{ij}$  was randomly imputed in the interval  $[L_{ij}; U_{ij}]$  according to the survival distribution estimated by the Cox proportional hazard model fitted at the preceding iteration. Note that only interval-censored durations required imputation and were then treated as "observed" values. Right-censored

durations were left untouched since Cox regression models already handle such data appropriately. The imputation process was cycled over 50 iterations. Convergence of the imputation algorithm was confirmed by monitoring the mean and standard deviation of each imputed variables over the iterations and ensuring a proper mixing of these parameters across the  $M$  imputed datasets.

We followed the procedure used in [25] and described in [26] to combine KM curves following MI. Namely, KM estimates were first calculated at predefined time points (every day, ranging from 0 to 60 days) in order to make them comparable across imputations. A complementary log-log transformation [27] was then applied to the daily KM estimates obtained in each imputed dataset before pooling the results using Rubin’s rules [23]. The statistical significance of the difference between KM curves obtained for negative and positive RT-PCR results was assessed using the log-rank test, after pooling the test statistics (chi-squared) obtained on each imputed dataset using the method described in [28].

Covariates included in the model were selected a priori based on clinical relevance and are detailed in table S1.

**Table S1.** Covariates entered in imputation models with their type and proportion of missing values. COVID-AMBU study, March-July 2020

| Variable                                                             | Type                  | Missing values |
|----------------------------------------------------------------------|-----------------------|----------------|
| Consultation center                                                  | Categorical           | none           |
| Age at initial consultation                                          | Continuous            | none           |
| Gender                                                               | Binary: male/female   | none           |
| BMI at initial consultation                                          | Continuous            | 2.8%           |
| Health care professional                                             | Binary: yes/no        | none           |
| Presence of $\geq 1$ risk factor(s)*                                 | Binary: yes/no        | 18.5%          |
| Smoker                                                               | Binary: yes/no        | 6.1%           |
| Use of AINS in last 7 days prior to consultation                     | Binary: yes/no        | 8.6%           |
| Professional exposition with confirmed case                          | Binary: yes/no        | none           |
| Contact with a suspected/confirmed case living in the same household | Binary: yes/no        | none           |
| Close contact with a confirmed case                                  | Binary: yes/no        | none           |
| Highest education level                                              | Ordinal: low/mid/high | 3.9%           |
| Type of job activity                                                 | Ordinal: low/mid/high | 7.1%           |
| PCR result ( $\geq 1$ positive result during follow-up period)       | Binary: neg./pos.     | 17.4%          |
| Body temperature at initial consultation                             | Continuous            | 6.0%           |
| Cardiac frequency at initial consultation                            | Continuous            | 7.1%           |
| Consultation period (after Apr. 27, 2020)                            | Binary: 0/1           | none           |
| Indicator $I_{ij}$ for absence of symptom $j$ in patient $i$         | Binary: 0/1           | none           |

---

|                                                               |             |      |
|---------------------------------------------------------------|-------------|------|
| Cumulative hazard for $D_{ij}$<br>(set to 0 if $I_{ij} = 1$ ) | Continuous  | none |
| Event indicator for $D_{ij}$<br>(set to 0 if $I_{ij} = 1$ )   | Binary: 0/1 | none |

Note that the hazard here refers to the event “disappearance of symptom(s)”. Consequently, a hazard ratio larger than one corresponds to an increased “risk” of experiencing the event, which in turns corresponds to a shorter duration of symptom(s). Conversely, a hazard ratio smaller than one corresponds to a longer duration of symptom(s).



**Table S2.** Symptoms and signs reported by COVID-19 suspect patients, by SARS-CoV-2 RT-PCR testing and test results. COVID-AMBU study, March-July 2020

| Symptoms and signs                                                 | Missing data | Total (N=883) |        | RT-PCR positive (N=123) |        | RT-PCR negative (N=606) |        | Not tested (N=154) |        | p-value of PCR-pos. vs neg. |
|--------------------------------------------------------------------|--------------|---------------|--------|-------------------------|--------|-------------------------|--------|--------------------|--------|-----------------------------|
|                                                                    |              | n             | %      | n                       | %      | n                       | %      | n                  | %      |                             |
| <b>Cough</b>                                                       | 3            | 607           | (69.0) | 99                      | (80.5) | 398                     | (65.9) | 110                | (71.9) | 0.002                       |
| <b>History of fever</b>                                            | 5            | 436           | (49.7) | 80                      | (65.6) | 292                     | (48.4) | 64                 | (41.8) | 0.001                       |
| <b>Sore throat</b>                                                 | 72           | 434           | (53.5) | 57                      | (51.8) | 322                     | (55.3) | 55                 | (46.2) | 0.498                       |
| <b>Myalgia</b>                                                     | 98           | 418           | (53.3) | 77                      | (68.8) | 282                     | (50.5) | 59                 | (51.3) | < 0.001                     |
| <b>Dyspnea</b>                                                     | 6            | 341           | (38.9) | 49                      | (40.2) | 236                     | (39.2) | 56                 | (36.6) | 0.843                       |
| <b>Headache</b>                                                    | 224          | 279           | (42.3) | 52                      | (49.5) | 185                     | (42.9) | 42                 | (34.2) | 0.222                       |
| <b>Fatigue</b>                                                     | 257          | 221           | (35.3) | 41                      | (40.6) | 153                     | (38.0) | 27                 | (22.1) | 0.627                       |
| <b>History of temperature <math>\geq 38^{\circ}\text{C}</math></b> | 5            | 193           | (22.0) | 41                      | (33.9) | 112                     | (18.5) | 40                 | (26.1) | < 0.001                     |
| <b>Rhinorrhea</b>                                                  | 225          | 191           | (29.0) | 33                      | (32.0) | 134                     | (30.9) | 24                 | (19.8) | 0.819                       |
| <b>Chest pain</b>                                                  | 259          | 165           | (26.4) | 20                      | (20.0) | 119                     | (29.3) | 26                 | (22.0) | 0.062                       |
| <b>Hypo-/a-gueusia</b>                                             | 190          | 148           | (21.4) | 44                      | (51.2) | 71                      | (13.9) | 33                 | (34.4) | < 0.001                     |
| <b>Hypo-/a-nosmia</b>                                              | 185          | 135           | (19.3) | 41                      | (47.1) | 60                      | (11.7) | 34                 | (34.0) | < 0.001                     |
| <b>Digestive symptoms<sup>1</sup></b>                              | 236          | 132           | (20.4) | 23                      | (21.9) | 95                      | (22.4) | 14                 | (12.0) | 0.921                       |
| <b>Chills</b>                                                      | 278          | 73            | (12.1) | 10                      | (10.5) | 53                      | (13.6) | 10                 | (8.8)  | 0.455                       |

|                                               |      |      |        |      |        |      |        |      |        |         |
|-----------------------------------------------|------|------|--------|------|--------|------|--------|------|--------|---------|
| <b>Abdominal pain</b>                         | 284  | 69   | (11.5) | 8    | (5.2)  | 52   | (13.5) | 9    | (7.8)  | 0.152   |
| <b>Dyspnea &gt; 4 days</b>                    | 6    | 63   | (7.2)  | 11   | (9.0)  | 45   | (7.5)  | 7    | (4.6)  | 0.561   |
| <b>Fever &gt; 4 days</b>                      | 6    | 34   | (3.9)  | 10   | (8.3)  | 17   | (2.8)  | 7    | (4.6)  | 0.004   |
| <b>Sweating</b>                               | 307  | 33   | (5.7)  | 9    | (9.5)  | 20   | (5.4)  | 4    | (3.5)  | 0.147   |
| <b>Signs mean (SD)</b>                        |      |      |        |      |        |      |        |      |        |         |
| <b>Temperature in °C</b>                      | 53   | 36.4 | (0.6)  | 36.7 | (0.8)  | 36.4 | (0.6)  | 36.3 | (0.6)  | 0.014   |
| <b>Oxygen saturation, In %, mean (SD)</b>     | 48   | 97.1 | (1.5)  | 96.7 | (2.3)  | 97.2 | (1.2)  | 97.0 | (1.5)  | 0.001   |
| <b>Respiratory rate, per min, mean (SD)</b>   | 315  | 17.6 | (5.5)  | 20.4 | (10.4) | 17.1 | (3.9)  | 18.7 | (4.8)  | < 0.001 |
| <b>Heart rate, per min, mean (SD)</b>         | 63   | 84.1 | (14.9) | 87.7 | (16.0) | 83.4 | (14.6) | 84.1 | (14.1) | 0.006   |
| <b>Systolic pressure, in mmHg, mean (SD)</b>  | 208  | 125  | (18.0) | 126  | (18.0) | 125  | (18.0) | 123  | (16.0) | 0.803   |
| <b>Diastolic pressure, in mmHg, mean (SD)</b> | 208  | 81   | (12.0) | 83   | (14.0) | 81   | (12.0) | 81   | (12.0) | 0.154   |
| <b>BMI in kg/m2 (SD)</b>                      | 25.0 | 25.2 | (4.9)  | 26.2 | (5.0)  | 25.1 | (5.1)  | 24.7 | (4.0)  | 0.035   |

<sup>1</sup>Digestive symptoms: reporting of nausea, vomiting or diarrhea

---
